# Supplementary material
Source: publisher figshare collection journal article supplement (https://acs.figshare.com/ndownloader/files/14486216)
Supplement: Supplementary file 1 [file 14486216]

# Reconfigurable ultraviolet and high-energy-visible dielectric metamaterials: Supporting Information

Behrad Gholipour<sup>1,2,3</sup>, Davide Piccinotti<sup>1</sup>, Artemios Karvounis<sup>1</sup>, Kevin F. MacDonald<sup>1</sup>,  
and Nikolay I. Zheludev<sup>1,4</sup>

<sup>1</sup> Optoelectronics Research Centre and Centre for Photonic Metamaterials,  
University of Southampton, Highfield, Southampton, SO15 4JB, UK

<sup>2</sup> Department of Chemistry, University of Southampton, Highfield, Southampton, SO15 4JB, UK

<sup>3</sup> Department of Electrical and Computer Engineering, University of Alberta, Edmonton, Canada

<sup>4</sup> Centre for Disruptive Photonic Technologies, School of Physical and Mathematical Sciences and  
The Photonics Institute, Nanyang Technological University, 637371, Singapore

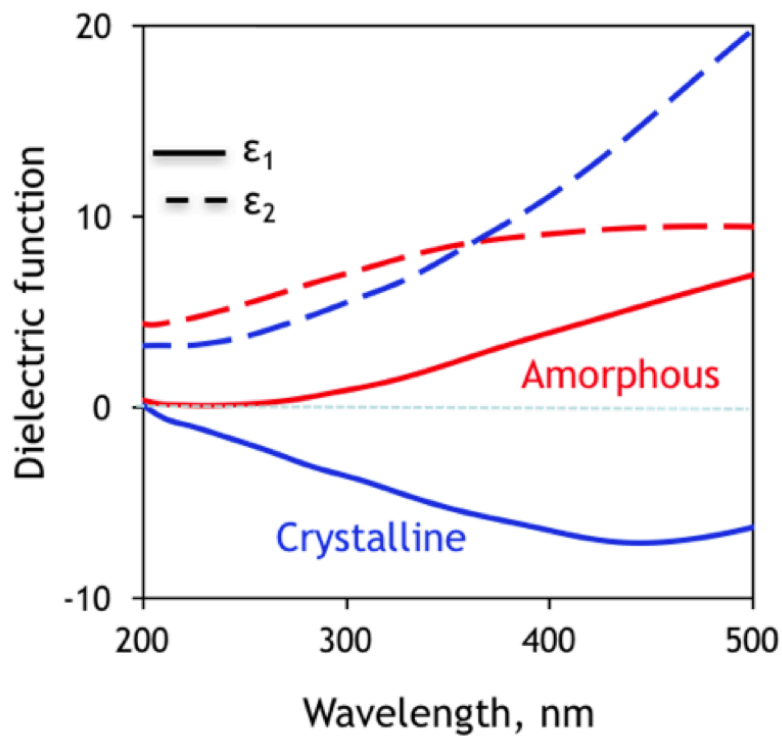

**Figure S1.** UV-HEV spectral dispersion (from variable angle ellipsometric measurements) of the real  $\epsilon_1$  (solid lines) and imaginary  $\epsilon_2$  (dashed) parts of the relative permittivity of sputtered germanium antimony telluride in its amorphous (red lines) and polycrystalline (blue) phases.

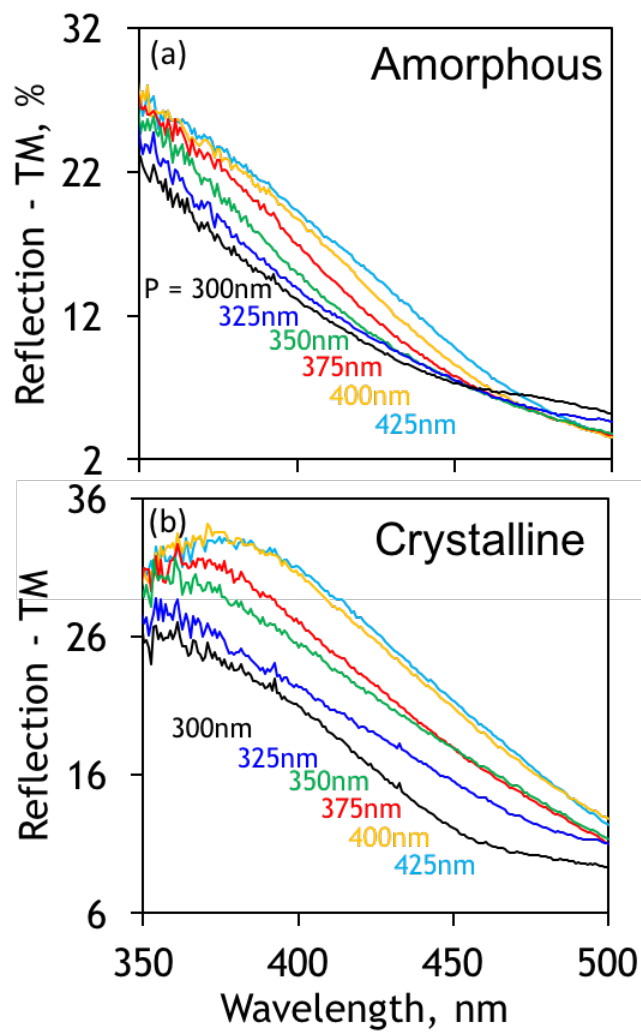

**Figure S2.** Measured spectral dispersion of ZnS/SiO<sub>2</sub>-GST-ZnS/SiO<sub>2</sub> nano-grating metamaterial TM reflection for a selection of grating periods  $P$  [as labelled], for the amorphous (a) and polycrystalline (b) states of the GST layer.
